# Supplementary material for: Prognostic Signatures Based on Ferroptosis- and Immune-Related Genes for Cervical Squamous Cell Carcinoma and Endocervical Adenocarcinoma
Source: PubMed Central journal article supplement (PMC8787259; doi:10.3389/fonc.2021.774558), 2022-01-11
Supplement: DataSheet_1.pdf [file DataSheet_1.pdf]

# Prognostic signatures based on ferroptosis- and immune-related genes for cervical squamous cell carcinoma and endocervical adenocarcinoma

Chaoqun Xing<sup>1,2#</sup>, Huiming Yin<sup>1,2#</sup>, Zhi-Yong Yao<sup>1</sup>, Xiao-Liang Xing<sup>1\*</sup>

<sup>1</sup>School of Public Health and Laboratory Medicine, Hunan University of Medicine, Huaihua 418000, Hunan, P. R. China.

<sup>2</sup>The first Affiliated Hospital of Hunan University of Medicine, Huaihua 418000, Hunan, P. R. China.

# contributed equally to this work.

\* correspondence: Xiao-Liang Xing, xiaoliangxingnm@126.com

**Supplementary information:** 2 figures and 2 tables

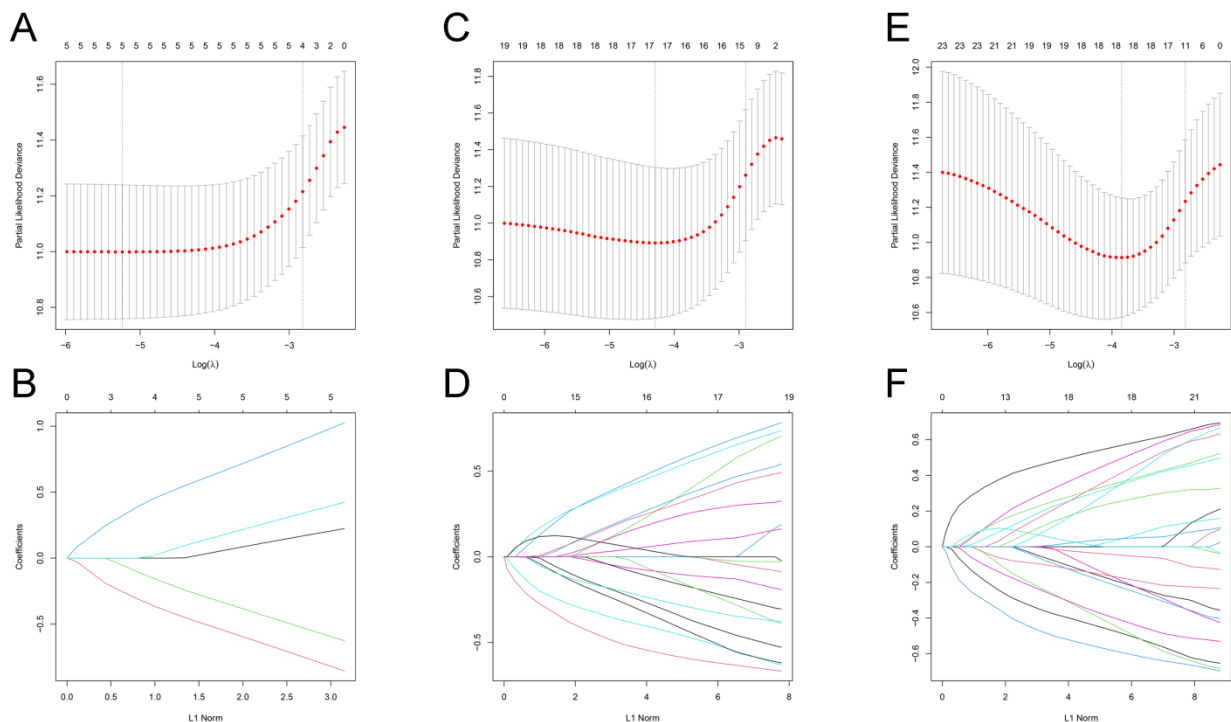

**Figure 1** LASSO analysis for the candidate biomarkers verified by univariate Cox regression. A-B, FR-DEGs, C-D, IR-DEGs, E-F, FI-DEGs.

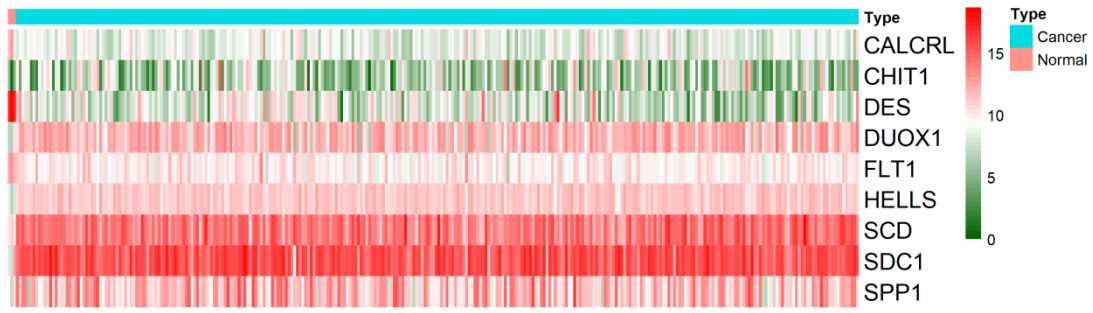

**Figure 2 Heatmap of candidate FR-DEGs, IR-DEGs, and FI-DEGs between normal and cancer.**

**Table 1 Clinical characters of all patients used in present study.**

| case_submitter_id | vital_status | os   | age | gender | pathologic |    |      |
|-------------------|--------------|------|-----|--------|------------|----|------|
|                   |              |      |     |        | m          | n  | t    |
| TCGA-C5-A8XJ      | Alive        | 4467 | 74  | female | NA         | NA | NA   |
| TCGA-EK-A3GM      | Alive        | 0    | 65  | female | NA         | NA | NA   |
| TCGA-VS-A957      | Alive        | 1688 | 64  | female | MX         | NX | T1b1 |
| TCGA-EK-A2RK      | Alive        | 13   | 67  | female | MX         | N0 | T1b1 |
| TCGA-EK-A2RB      | Alive        | 9    | 48  | female | NA         | NA | NA   |
| TCGA-LP-A4AU      | Alive        | 343  | 35  | female | M0         | N1 | T2   |
| TCGA-BI-A0VR      | Alive        | 1505 | 53  | female | M0         | N1 | T2b  |
| TCGA-DS-A5RQ      | Alive        | 512  | 80  | female | MX         | N0 | T1b1 |
| TCGA-JW-A5VK      | Alive        | 623  | 43  | female | MX         | NX | T1b2 |
| TCGA-VS-A950      | Alive        | 1221 | 42  | female | MX         | NX | T3a  |
| TCGA-JX-A5QV      | Alive        | 636  | 37  | female | M0         | N0 | T1b1 |
| TCGA-EK-A3GN      | Alive        | 27   | 47  | female | NA         | NX | TX   |
| TCGA-EK-A2PG      | Alive        | 46   | 88  | female | NA         | NA | NA   |
| TCGA-DG-A2KM      | Alive        | 1946 | 46  | female | M0         | N1 | T1b1 |
| TCGA-EK-A2RO      | Alive        | 2    | 59  | female | NA         | NA | NA   |
| TCGA-FU-A3WB      | Alive        | 491  | 43  | female | MX         | N0 | T2a2 |
| TCGA-VS-A9U5      | Alive        | 1535 | 57  | female | MX         | NX | T2b  |
| TCGA-MY-A5BD      | Alive        | 1667 | 62  | female | M0         | N0 | T2b  |
| TCGA-C5-A2LY      | Alive        | 2383 | 30  | female | M0         | N0 | T1b1 |
| TCGA-FU-A5XV      | Alive        | 321  | 32  | female | MX         | N1 | T1b2 |
| TCGA-JW-A5VJ      | Alive        | 652  | 56  | female | MX         | NX | T2b  |
| TCGA-VS-A952      | Alive        | 1778 | 66  | female | MX         | N0 | T1b  |
| TCGA-EK-A2GZ      | Alive        | 383  | 64  | female | NA         | NA | NA   |
| TCGA-LP-A7HU      | Alive        | 406  | 53  | female | M0         | N0 | T2   |
| TCGA-C5-A2LT      | Alive        | 2226 | 38  | female | M0         | N0 | T1b  |
| TCGA-MA-AA42      | Alive        | 259  | 75  | female | M0         | N0 | T2b  |
| TCGA-FU-A3EO      | Alive        | 490  | 55  | female | MX         | N0 | T2b  |
| TCGA-LP-A4AV      | Alive        | 0    | 63  | female | M0         | N0 | T1b  |
| TCGA-IR-A3LH      | Alive        | 2394 | 49  | female | M0         | N0 | T2a1 |
| TCGA-VS-A9UD      | Alive        | 739  | 73  | female | MX         | NX | T3a  |
| TCGA-C5-A8XK      | Alive        | 3039 | 30  | female | NA         | NA | NA   |
| TCGA-EK-A2H1      | Alive        | 799  | 20  | female | NA         | NA | NA   |

|              |       |      |    |        |    |    |      |
|--------------|-------|------|----|--------|----|----|------|
| TCGA-EA-A3HS | Alive | 959  | 35 | female | M0 | N0 | T1b  |
| TCGA-Q1-A73S | Alive | 688  | 33 | female | MX | N1 | T1b1 |
| TCGA-MA-AA3Z | Alive | 595  | 43 | female | M0 | N0 | T1b2 |
| TCGA-EX-A1H5 | Alive | 619  | 58 | female | MX | N1 | T2b  |
| TCGA-MA-AA3W | Alive | 685  | 54 | female | M0 | N1 | T1b1 |
| TCGA-EX-A449 | Alive | 447  | 42 | female | M1 | NX | T1b1 |
| TCGA-MU-A51Y | Alive | 854  | 27 | female | MX | N0 | T2a1 |
| TCGA-JW-A5VG | Alive | 834  | 35 | female | MX | NX | T2a  |
| TCGA-FU-A3TX | Alive | 45   | 78 | female | M0 | N0 | T1b2 |
| TCGA-VS-A9U7 | Alive | 1472 | 30 | female | M0 | N1 | T1b  |
| TCGA-EA-A3HT | Alive | 954  | 68 | female | M0 | N0 | T1b  |
| TCGA-BI-A20A | Alive | 720  | 49 | female | M0 | N0 | T1b1 |
| TCGA-VS-A9V3 | Alive | 540  | 62 | female | MX | NX | T4   |
| TCGA-EA-A411 | Alive | 747  | 50 | female | M0 | N0 | T1b1 |
| TCGA-ZJ-AB0I | Alive | 0    | 25 | female | MX | N1 | T2b  |
| TCGA-C5-A3HE | Alive | 548  | 44 | female | M0 | N0 | T1b2 |
| TCGA-C5-A3HL | Alive | 621  | 76 | female | MX | N0 | T1b2 |
| TCGA-C5-A907 | Alive | 448  | 47 | female | NA | NA | NA   |
| TCGA-JW-A5VI | Alive | 747  | 45 | female | MX | NX | T2b  |
| TCGA-VS-A94W | Alive | 1243 | 39 | female | MX | N1 | T2b  |
| TCGA-ZJ-AAXA | Alive | 43   | 64 | female | MX | N0 | T1b  |
| TCGA-ZJ-AB0H | Alive | 0    | 48 | female | M0 | N1 | T3b  |
| TCGA-LP-A4AX | Alive | 380  | 45 | female | M0 | N0 | T1b1 |
| TCGA-DG-A2KH | Alive | 34   | 25 | female | M0 | N0 | T1b1 |
| TCGA-EX-A3L1 | Alive | 463  | 32 | female | M0 | N0 | T2a1 |
| TCGA-ZJ-AAXN | Alive | 0    | 34 | female | M0 | N1 | T1b2 |
| TCGA-FU-A23L | Alive | 725  | 60 | female | MX | N0 | T2a1 |
| TCGA-VS-A9U6 | Alive | 1320 | 52 | female | M1 | NX | T4   |
| TCGA-C5-A7X8 | Alive | 83   | 35 | female | M0 | N1 | T2a  |
| TCGA-ZJ-AAXF | Alive | 0    | 62 | female | M0 | N0 | T2b  |
| TCGA-EA-A43B | Alive | 791  | 43 | female | M0 | N0 | T1b1 |
| TCGA-EK-A2RN | Alive | 71   | 45 | female | MX | N1 | T2b  |
| TCGA-R2-A69V | Alive | 596  | 42 | female | M0 | N0 | T1b  |
| TCGA-C5-A905 | Alive | 4879 | 37 | female | MX | N0 | T1b  |
| TCGA-C5-A7CG | Alive | 6408 | 55 | female | MX | N0 | T1b  |

|              |       |      |    |        |    |    |      |
|--------------|-------|------|----|--------|----|----|------|
| TCGA-EX-A1H6 | Alive | 241  | 38 | female | MX | N0 | T1b1 |
| TCGA-JW-A5VL | Alive | 474  | 37 | female | MX | NX | T1b2 |
| TCGA-PN-A8MA | Alive | 90   | 43 | female | M0 | N0 | T2b  |
| TCGA-ZJ-AAX4 | Alive | 21   | 85 | female | M0 | N0 | T2   |
| TCGA-HM-A4S6 | Alive | 454  | 51 | female | MX | N1 | T1b2 |
| TCGA-FU-A3HY | Alive | 954  | 47 | female | MX | N1 | T1b2 |
| TCGA-C5-A1MP | Alive | 109  | 34 | female | MX | N1 | T1b2 |
| TCGA-EA-A44S | Alive | 369  | 31 | female | M0 | N1 | T2a2 |
| TCGA-DS-A10C | Alive | 376  | 47 | female | M0 | N1 | T1b1 |
| TCGA-ZJ-AAXJ | Alive | 0    | 43 | female | MX | N0 | T2b  |
| TCGA-DR-A0ZL | Alive | 2669 | 53 | female | M0 | N0 | T1b1 |
| TCGA-FU-A3HZ | Alive | 1103 | 64 | female | M0 | N0 | T2a2 |
| TCGA-LP-A5U3 | Alive | 25   | 40 | female | M0 | N0 | T1b1 |
| TCGA-IR-A3LC | Alive | 3935 | 40 | female | M0 | N0 | T1b1 |
| TCGA-C5-A1M7 | Alive | 1409 | 37 | female | MX | N0 | T1b  |
| TCGA-EK-A2PM | Alive | 18   | 81 | female | NA | NA | NA   |
| TCGA-VS-A9UZ | Alive | 2044 | 61 | female | MX | N0 | T1b  |
| TCGA-JW-AAVH | Alive | 552  | 46 | female | M0 | N0 | T1b1 |
| TCGA-VS-A8QA | Alive | 1099 | 44 | female | MX | N0 | T1b1 |
| TCGA-C5-A8XI | Alive | 254  | 69 | female | MX | N0 | T1b2 |
| TCGA-DS-A10D | Alive | 3874 | 49 | female | M0 | N0 | T1b1 |
| TCGA-C5-A2LS | Alive | 1345 | 37 | female | M0 | N0 | T1b2 |
| TCGA-FU-A40J | Alive | 426  | 38 | female | MX | N1 | T2a1 |
| TCGA-UC-A7PI | Alive | 2114 | 44 | female | MX | N0 | T1b1 |
| TCGA-4J-AA1J | Alive | 542  | 31 | female | M0 | N0 | T1b2 |
| TCGA-ZJ-A8QO | Alive | 0    | 73 | female | NA | NA | NA   |
| TCGA-VS-A8EH | Alive | 986  | 56 | female | M0 | NX | T3b  |
| TCGA-C5-A901 | Alive | 518  | 44 | female | MX | N1 | TX   |
| TCGA-DS-A3LQ | Alive | 699  | 46 | female | M0 | N1 | T3b  |
| TCGA-ZJ-AAXU | Alive | 5    | 51 | female | M0 | N0 | T2b  |
| TCGA-ZJ-AAXT | Alive | 0    | 54 | female | M0 | N1 | T3b  |
| TCGA-EK-A2PI | Alive | 586  | 44 | female | NA | NA | NA   |
| TCGA-EK-A2RA | Alive | 1246 | 74 | female | MX | N0 | T2a2 |
| TCGA-EK-A2H0 | Alive | 1847 | 24 | female | NA | NA | NA   |
| TCGA-EA-A5ZF | Alive | 828  | 56 | female | M0 | NX | T1b1 |

|              |       |      |    |        |    |    |      |
|--------------|-------|------|----|--------|----|----|------|
| TCGA-C5-A2LV | Alive | 2234 | 36 | female | MX | N1 | T1b  |
| TCGA-C5-A1BK | Alive | 5385 | 36 | female | MX | N0 | T1b  |
| TCGA-C5-A7CO | Alive | 4482 | 68 | female | NA | NA | NA   |
| TCGA-VS-A9UT | Alive | 482  | 72 | female | MX | N1 | T1b1 |
| TCGA-MA-AA41 | Alive | 279  | 33 | female | M1 | N1 | T2   |
| TCGA-VS-A954 | Alive | 1714 | 67 | female | MX | NX | T3b  |
| TCGA-ZJ-AAX8 | Alive | 0    | 58 | female | M0 | N1 | T3b  |
| TCGA-C5-A1BL | Alive | 5271 | 32 | female | NA | NA | NA   |
| TCGA-C5-A1BJ | Alive | 4385 | 34 | female | NA | NA | NA   |
| TCGA-C5-A1MQ | Alive | 1031 | 35 | female | M0 | N0 | T2b  |
| TCGA-VS-A9V0 | Alive | 573  | 58 | female | MX | NX | T1b  |
| TCGA-EK-A2IR | Alive | 3442 | 48 | female | MX | N0 | T1b  |
| TCGA-C5-A902 | Alive | 149  | 35 | female | NA | NA | NA   |
| TCGA-VS-A9UC | Alive | 825  | 32 | female | MX | NX | T2b  |
| TCGA-VS-A9UH | Alive | 1427 | 53 | female | MX | NX | T4   |
| TCGA-MA-AA3X | Alive | 617  | 50 | female | MX | NX | T3b  |
| TCGA-EA-A3Y4 | Alive | 1122 | 40 | female | M0 | N0 | T1b  |
| TCGA-MY-A5BE | Alive | 1066 | 42 | female | MX | N0 | T1b1 |
| TCGA-EK-A2RJ | Alive | 53   | 51 | female | MX | N0 | T1b2 |
| TCGA-VS-A8Q9 | Alive | 1630 | 79 | female | MX | NX | TX   |
| TCGA-MY-A5BF | Alive | 634  | 68 | female | MX | N0 | T2a2 |
| TCGA-EA-A3HQ | Alive | 1136 | 60 | female | M0 | N0 | T2a  |
| TCGA-Q1-A6DV | Alive | 491  | 36 | female | M0 | N0 | T1b1 |
| TCGA-EK-A3GJ | Alive | 3    | 51 | female | NA | N0 | T1b1 |
| TCGA-VS-A8EL | Alive | 1992 | 38 | female | M0 | NX | T2b  |
| TCGA-C5-A7XC | Alive | 1551 | 26 | female | M0 | N0 | T1b  |
| TCGA-EA-A6QX | Alive | 730  | 49 | female | M0 | N1 | T1b1 |
| TCGA-ZJ-AAXB | Alive | 0    | 42 | female | M0 | N0 | T1b2 |
| TCGA-EA-A4BA | Alive | 755  | 49 | female | M0 | N0 | T1b2 |
| TCGA-VS-A959 | Alive | 1561 | 76 | female | MX | NX | T2b  |
| TCGA-MA-AA43 | Alive | 346  | 48 | female | MX | NX | T3b  |
| TCGA-Q1-A5R1 | Alive | 474  | 32 | female | MX | N0 | T1b1 |
| TCGA-EK-A2RM | Alive | 50   | 40 | female | NA | NA | NA   |
| TCGA-EK-A2RE | Alive | 57   | 26 | female | MX | N0 | T2a2 |
| TCGA-RA-A741 | Alive | 444  | 34 | female | NA | NA | NA   |

|              |       |      |    |        |    |    |      |
|--------------|-------|------|----|--------|----|----|------|
| TCGA-FU-A23K | Alive | 372  | 28 | female | MX | N1 | T1b1 |
| TCGA-VS-A9V2 | Alive | 555  | 29 | female | MX | N0 | T1b  |
| TCGA-EA-A439 | Alive | 965  | 50 | female | M0 | N0 | T2a1 |
| TCGA-C5-A7CH | Alive | 4694 | 43 | female | NA | NA | NA   |
| TCGA-C5-A1M8 | Alive | 919  | 43 | female | MX | N0 | T1b  |
| TCGA-VS-A8EG | Alive | 1386 | 36 | female | M0 | NX | T1b1 |
| TCGA-EK-A2PK | Alive | 12   | 43 | female | NA | NA | NA   |
| TCGA-VS-A8EC | Alive | 1415 | 55 | female | M0 | NX | T3b  |
| TCGA-FU-A57G | Alive | 1078 | 49 | female | MX | N0 | T1b2 |
| TCGA-EK-A2R9 | Alive | 4    | 58 | female | NA | N0 | T1b1 |
| TCGA-EK-A2RC | Alive | 129  | 33 | female | NA | NA | NA   |
| TCGA-VS-A9UO | Alive | 1456 | 43 | female | MX | N0 | T2b  |
| TCGA-MY-A913 | Alive | 524  | 28 | female | M1 | N0 | Tis  |
| TCGA-VS-A94Z | Alive | 1015 | 38 | female | MX | NX | T2b  |
| TCGA-DR-A0ZM | Alive | 1791 | 61 | female | M0 | N0 | T2b  |
| TCGA-VS-A8QF | Alive | 1800 | 42 | female | MX | NX | TX   |
| TCGA-VS-A958 | Alive | 1525 | 46 | female | MX | NX | T2b  |
| TCGA-DS-A7WH | Alive | 533  | 34 | female | MX | N0 | T1b1 |
| TCGA-EA-A3HR | Alive | 940  | 57 | female | M0 | N0 | T2a  |
| TCGA-EA-A1QT | Alive | 1243 | 47 | female | M0 | N0 | T1b  |
| TCGA-C5-A8ZZ | Alive | 636  | 41 | female | NA | NA | NA   |
| TCGA-HM-A6W2 | Alive | 287  | 34 | female | M1 | N0 | T2a  |
| TCGA-C5-A7CM | Alive | 619  | 35 | female | NA | NA | NA   |
| TCGA-MA-AA3Y | Alive | 542  | 48 | female | M0 | N0 | T1b1 |
| TCGA-C5-A2LX | Alive | 2526 | 54 | female | MX | N1 | T2   |
| TCGA-EK-A2R8 | Alive | 44   | 48 | female | MX | N1 | T1b2 |
| TCGA-DG-A2KJ | Alive | 2893 | 50 | female | M0 | N1 | T1b  |
| TCGA-LP-A4AW | Alive | 27   | 52 | female | M0 | N0 | T1b  |
| TCGA-IR-A3LF | Alive | 2949 | 64 | female | M0 | N0 | T1b1 |
| TCGA-EA-A3QD | Alive | 397  | 59 | female | M0 | N1 | T1b1 |
| TCGA-2W-A8YY | Alive | 533  | 51 | female | M0 | N0 | T2a2 |
| TCGA-C5-A7UE | Alive | 4738 | 45 | female | NA | NA | NA   |
| TCGA-C5-A7UH | Alive | 3988 | 55 | female | NA | NA | NA   |
| TCGA-C5-A2M1 | Alive | 1169 | 37 | female | MX | N0 | T1b1 |
| TCGA-EK-A3GK | Alive | 15   | 33 | female | MX | N0 | T1b1 |

|              |       |      |    |        |    |    |      |
|--------------|-------|------|----|--------|----|----|------|
| TCGA-DG-A2KL | Alive | 1367 | 53 | female | M0 | N0 | T2a  |
| TCGA-MU-A5YI | Alive | 1053 | 60 | female | MX | NX | T1a1 |
| TCGA-MU-A8JM | Alive | 607  | 46 | female | MX | N0 | T1b  |
| TCGA-DS-A0VM | Alive | 3589 | 51 | female | M0 | N1 | T1b1 |
| TCGA-VS-A9UB | Alive | 911  | 54 | female | MX | N0 | T2b  |
| TCGA-Q1-A73R | Alive | 567  | 45 | female | MX | NX | TX   |
| TCGA-FU-A2QG | Alive | 579  | 29 | female | NA | N0 | T1b1 |
| TCGA-C5-A1MF | Alive | 1617 | 49 | female | MX | N0 | T1b2 |
| TCGA-C5-A3HD | Alive | 1582 | 51 | female | NA | NA | NA   |
| TCGA-ZJ-AAXI | Alive | 0    | 67 | female | M0 | NX | T2b  |
| TCGA-BI-A0VS | Alive | 1735 | 48 | female | M0 | N0 | T1b1 |
| TCGA-EA-A5FO | Alive | 815  | 59 | female | M0 | N0 | T1b1 |
| TCGA-LP-A5U2 | Alive | 9    | 30 | female | MX | N1 | T2a  |
| TCGA-Q1-A5R3 | Alive | 485  | 56 | female | MX | NX | TX   |
| TCGA-EA-A97N | Alive | 11   | 38 | female | M0 | N0 | T1b2 |
| TCGA-IR-A3LA | Alive | 4172 | 60 | female | M0 | N0 | T1b1 |
| TCGA-JX-A3Q8 | Alive | 1357 | 40 | female | MX | N0 | T1b1 |
| TCGA-FU-A3YQ | Alive | 861  | 35 | female | MX | N0 | T1b1 |
| TCGA-IR-A3LI | Alive | 2493 | 48 | female | M1 | N1 | T2b  |
| TCGA-EA-A78R | Alive | 410  | 54 | female | M0 | NX | T1b1 |
| TCGA-JW-A69B | Alive | 863  | 44 | female | MX | NX | T1b2 |
| TCGA-EA-A3QE | Alive | 761  | 45 | female | M0 | N0 | T1b  |
| TCGA-VS-A9UR | Alive | 793  | 53 | female | MX | NX | T2a  |
| TCGA-FU-A770 | Alive | 34   | 33 | female | MX | N1 | T2a2 |
| TCGA-EA-A5ZD | Alive | 830  | 40 | female | M0 | N0 | T1b1 |
| TCGA-ZJ-A8QQ | Alive | 2056 | 24 | female | M0 | N0 | T1b2 |
| TCGA-C5-A1ME | Alive | 1756 | 40 | female | M0 | N0 | T1b1 |
| TCGA-VS-A9UQ | Alive | 1263 | 32 | female | MX | N0 | T1b  |
| TCGA-EK-A2PL | Alive | 13   | 36 | female | NA | NA | NA   |
| TCGA-EA-A410 | Alive | 803  | 51 | female | M0 | N0 | T2a2 |
| TCGA-DS-A0VN | Alive | 3609 | 47 | female | M0 | N0 | T1b2 |
| TCGA-EK-A2IP | Alive | 202  | 28 | female | MX | N0 | T1b1 |
| TCGA-IR-A3L7 | Alive | 4483 | 37 | female | M0 | N0 | T1b1 |
| TCGA-EA-A3HU | Alive | 1013 | 43 | female | M0 | N0 | T2a2 |
| TCGA-DG-A2KK | Alive | 2496 | 51 | female | M0 | N1 | T1b1 |



|              |       |      |    |        |    |    |      |
|--------------|-------|------|----|--------|----|----|------|
| TCGA-WL-A834 | Alive | 791  | 57 | female | NA | N1 | T1b1 |
| TCGA-ZX-AA5X | Alive | 119  | 64 | female | MX | NX | TX   |
| TCGA-EX-A8YF | Alive | 473  | 44 | female | M0 | N0 | T2a1 |
| TCGA-GH-A9DA | Alive | 540  | 27 | female | MX | N0 | T1b  |
| TCGA-Q1-A73O | Alive | 428  | 37 | female | MX | NX | TX   |
| TCGA-EA-A5O9 | Alive | 788  | 39 | female | M0 | N0 | T1b2 |
| TCGA-VS-A9UP | Alive | 1444 | 43 | female | MX | NX | T2a  |
| TCGA-EX-A69L | Alive | 602  | 41 | female | M0 | N0 | T1b1 |
| TCGA-FU-A3TQ | Alive | 795  | 55 | female | MX | N1 | T2b  |
| TCGA-VS-A8EI | Alive | 729  | 38 | female | M0 | NX | T3b  |
| TCGA-VS-A9UU | Alive | 442  | 42 | female | MX | NX | T2b  |
| TCGA-Q1-A73P | Alive | 483  | 45 | female | MX | N0 | T1b  |
| TCGA-EA-A5ZE | Alive | 829  | 54 | female | M0 | N0 | T1b1 |
| TCGA-IR-A3LL | Alive | 1106 | 60 | female | M0 | N0 | T1b1 |
| TCGA-JX-A3Q0 | Alive | 6375 | 63 | female | M0 | N0 | T3   |
| TCGA-Q1-A73Q | Alive | 284  | 46 | female | MX | NX | TX   |
| TCGA-XS-A8TJ | Alive | 890  | 41 | female | M0 | N1 | T1b1 |
| TCGA-HM-A3JK | Alive | 632  | 64 | female | MX | N1 | T2b  |
| TCGA-C5-A1BI | Alive | 1112 | 31 | female | NA | NA | NA   |
| TCGA-EA-A556 | Alive | 453  | 38 | female | M0 | N0 | T1b1 |
| TCGA-EK-A2R7 | Alive | 27   | 45 | female | M0 | N1 | T1b1 |
| TCGA-EA-A1QS | Alive | 1203 | 46 | female | M0 | N0 | T1b1 |
| TCGA-ZJ-AAXD | Alive | 0    | 35 | female | M0 | N0 | T3b  |
| TCGA-Q1-A5R2 | Alive | 499  | 64 | female | MX | NX | TX   |
| TCGA-Q1-A6DW | Alive | 534  | 44 | female | MX | NX | TX   |
| TCGA-VS-A9UY | Dead  | 555  | 29 | female | MX | NX | T1b2 |
| TCGA-FU-A3NI | Dead  | 638  | 45 | female | MX | N1 | T1b1 |
| TCGA-VS-A9UV | Dead  | 104  | 74 | female | MX | NX | T4   |
| TCGA-VS-A9V5 | Dead  | 494  | 50 | female | MX | NX | T2b  |
| TCGA-VS-A9UM | Dead  | 829  | 39 | female | MX | NX | T3b  |
| TCGA-UC-A7PF | Dead  | 2859 | 44 | female | M0 | N1 | T1b1 |
| TCGA-EA-A50E | Dead  | 227  | 45 | female | M0 | N1 | T4   |
| TCGA-C5-A8YT | Dead  | 633  | 36 | female | NA | NA | NA   |
| TCGA-VS-A8EB | Dead  | 305  | 41 | female | M1 | NX | T3b  |
| TCGA-VS-A8EJ | Dead  | 607  | 60 | female | M1 | NX | T2b  |

|              |      |      |    |        |    |    |      |
|--------------|------|------|----|--------|----|----|------|
| TCGA-VS-A8QH | Dead | 1210 | 76 | female | MX | NX | TX   |
| TCGA-C5-A1MJ | Dead | 14   | 61 | female | MX | N0 | T1b1 |
| TCGA-DS-A7WI | Dead | 252  | 43 | female | MX | N1 | T2a2 |
| TCGA-C5-A7CJ | Dead | 3097 | 42 | female | MX | N1 | T2a  |
| TCGA-C5-A2M2 | Dead | 1011 | 56 | female | NA | NA | NA   |
| TCGA-UC-A7PD | Dead | 355  | 21 | female | M0 | N0 | T1b  |
| TCGA-HM-A3JJ | Dead | 659  | 40 | female | MX | N1 | T1b1 |
| TCGA-C5-A1BQ | Dead | 604  | 65 | female | NA | NA | NA   |
| TCGA-C5-A1BN | Dead | 166  | 26 | female | NA | NA | NA   |
| TCGA-EK-A2RL | Dead | 1453 | 32 | female | MX | N1 | T1b1 |
| TCGA-IR-A3LB | Dead | 2032 | 53 | female | M0 | N0 | T1b1 |
| TCGA-JX-A3PZ | Dead | 642  | 25 | female | M0 | N0 | T1b  |
| TCGA-JW-A852 | Dead | 252  | 42 | female | MX | N1 | T2b  |
| TCGA-VS-A8EK | Dead | 829  | 65 | female | M0 | NX | T4   |
| TCGA-C5-A1MN | Dead | 1245 | 42 | female | NA | NA | NA   |
| TCGA-VS-A94X | Dead | 506  | 40 | female | MX | NX | T2b  |
| TCGA-VS-A8QM | Dead | 951  | 47 | female | M1 | NX | TX   |
| TCGA-DS-A1O9 | Dead | 266  | 75 | female | M0 | N0 | T4   |
| TCGA-C5-A8YR | Dead | 837  | 56 | female | M0 | N0 | T1b  |
| TCGA-C5-A0TN | Dead | 348  | 21 | female | MX | N1 | T1b  |
| TCGA-C5-A7CK | Dead | 4086 | 58 | female | NA | NA | NA   |
| TCGA-C5-A2LZ | Dead | 3046 | 65 | female | NA | NA | NA   |
| TCGA-DS-A1OA | Dead | 879  | 77 | female | M0 | N1 | T1b1 |
| TCGA-C5-A7CL | Dead | 471  | 48 | female | NA | NA | NA   |
| TCGA-EX-A69M | Dead | 253  | 62 | female | M0 | N0 | T1b2 |
| TCGA-JW-A5VH | Dead | 100  | 53 | female | M1 | NX | T4   |
| TCGA-C5-A1BM | Dead | 2520 | 78 | female | MX | N1 | T2   |
| TCGA-Q1-A6DT | Dead | 275  | 55 | female | MX | NX | TX   |
| TCGA-C5-A1M9 | Dead | 1065 | 46 | female | M0 | N1 | T3b  |
| TCGA-HG-A2PA | Dead | 773  | 38 | female | M0 | N0 | T1b2 |
| TCGA-C5-A8YQ | Dead | 715  | 79 | female | NA | NA | NA   |
| TCGA-VS-A9V1 | Dead | 157  | 46 | female | MX | NX | T3b  |
| TCGA-C5-A1BF | Dead | 570  | 46 | female | MX | N0 | TX   |
| TCGA-C5-A1ML | Dead | 636  | 49 | female | NA | NA | NA   |
| TCGA-VS-A9UL | Dead | 442  | 79 | female | MX | NX | T3b  |

|              |      |      |    |        |    |    |      |
|--------------|------|------|----|--------|----|----|------|
| TCGA-C5-A7UC | Dead | 523  | 48 | female | M0 | N0 | T1b  |
| TCGA-C5-A8XH | Dead | 1394 | 39 | female | MX | N0 | T1b1 |
| TCGA-VS-A9UJ | Dead | 52   | 55 | female | MX | NX | T2b  |
| TCGA-VS-A8QC | Dead | 350  | 51 | female | MX | NX | TX   |
| TCGA-VS-A9V4 | Dead | 132  | 63 | female | MX | NX | T4   |
| TCGA-C5-A1MH | Dead | 1186 | 71 | female | NA | NA | NA   |
| TCGA-C5-A3HF | Dead | 543  | 24 | female | NA | NA | NA   |
| TCGA-VS-A9UI | Dead | 1372 | 76 | female | MX | NX | T2b  |
| TCGA-VS-A94Y | Dead | 144  | 47 | female | MX | NX | T2b  |
| TCGA-C5-A7X5 | Dead | 414  | 72 | female | NA | NA | NA   |
| TCGA-IR-A3LK | Dead | 908  | 69 | female | M0 | N0 | T1b2 |
| TCGA-C5-A1MI | Dead | 1083 | 50 | female | M0 | N1 | T1b1 |
| TCGA-DS-A0VK | Dead | 1118 | 45 | female | M0 | N1 | T1b1 |
| TCGA-C5-A1M5 | Dead | 2052 | 53 | female | M0 | N0 | T1b  |
| TCGA-VS-A8Q8 | Dead | 978  | 26 | female | MX | N0 | T1b  |
| TCGA-VS-AA62 | Dead | 469  | 51 | female | MX | NX | T2b  |
| TCGA-DS-A7WF | Dead | 492  | 41 | female | MX | N0 | T1b2 |
| TCGA-C5-A7UI | Dead | 2888 | 42 | female | MX | N0 | T1b1 |
| TCGA-C5-A1BE | Dead | 2094 | 64 | female | MX | N1 | T1b  |
| TCGA-DS-A1OB | Dead | 861  | 45 | female | M0 | N1 | T1b2 |
| TCGA-C5-A1M6 | Dead | 955  | 55 | female | NA | NA | NA   |
| TCGA-C5-A7X3 | Dead | 284  | 70 | female | NA | NA | NA   |
| TCGA-UC-A7PG | Dead | 370  | 44 | female | MX | N1 | T3b  |
| TCGA-VS-A953 | Dead | 477  | 63 | female | MX | NX | T4   |
| TCGA-C5-A1MK | Dead | 74   | 79 | female | NA | NA | NA   |
| TCGA-DS-A0VL | Dead | 1692 | 25 | female | M0 | N0 | T1b1 |
| TCGA-ZJ-A8QR | Dead | 582  | 38 | female | MX | NX | TX   |

**Table 2 Immune infiltrating cells and factors with significant difference between normal and cancer**

| Type          | Cell                            | Normal (n=3) |      | Cancer (n=304) |          |
|---------------|---------------------------------|--------------|------|----------------|----------|
|               |                                 | Mean         | SD   | Mean           | SD       |
| CIBERSORT     | Mast cell activated             | 1.00         | 0.89 | 0.13           | 0.19     |
|               | T cell follicular helper        | 1.00         | 0.59 | 17.48          | 8.75     |
|               | B cell naive                    | 1.00         | 1.14 | 0.25           | 0.47     |
|               | Macrophage M1                   | 1.00         | 0.26 | 14.73          | 11.04    |
|               | T cell CD4+ memory resting      | 1.00         | 0.78 | 0.43           | 0.46     |
|               | Monocyte                        | 1.00         | 0.29 | 0.37           | 0.54     |
| CIBERSORT-ABS | Mast cell activated             | 1.00         | 1.06 | 0.25           | 0.42     |
|               | T cell follicular helper        | 1.00         | 0.72 | 28.12          | 19.67    |
| EPIC          | Endothelial cell                | 1.00         | 0.26 | 0.15           | 0.11     |
|               | uncharacterized cell            | 1.00         | 0.21 | 1.20           | 0.10     |
|               | Cancer associated fibroblast    | 1.00         | 0.96 | 0.32           | 0.48     |
| MCPCOUNTER    | Cancer associated fibroblast    | 1.00         | 0.71 | 0.08           | 0.10     |
|               | Endothelial cell                | 1.00         | 0.39 | 0.19           | 0.11     |
| QUANTISEQ     | T cell CD4+ (non-regulatory)    | 1.00         | 1.06 | 0.11           | 0.28     |
|               | Myeloid dendritic cell          | 1.00         | 0.87 | 0.20           | 0.48     |
|               | Neutrophil                      | 1.00         | 0.48 | 2.74           | 1.42     |
| XCELL         | stroma score                    | 1.00         | 0.12 | 0.05           | 0.06     |
| XCELL         | Cancer associated fibroblast    | 1.00         | 0.07 | 0.05           | 0.07     |
|               | Endothelial cell                | 1.00         | 0.25 | 0.03           | 0.07     |
|               | Hematopoietic stem cell         | 1.00         | 0.20 | 0.07           | 0.07     |
|               | Common myeloid progenitor       | 1.00         | 0.60 | 0.07           | 0.12     |
|               | Granulocyte-monocyte progenitor | 1.00         | 1.16 | 0.05           | 0.18     |
|               | microenvironment score          | 1.00         | 0.09 | 0.22           | 0.20     |
|               | T cell CD4+ Th1                 | 1.00         | 1.26 | 4.76E+16       | 3.55E+16 |
|               | T cell gamma delta              | 1.00         | 1.31 | 1.63E+16       | 1.23E+16 |
|               | T cell CD4+ Th2                 | 1.00         | 1.73 | 4.96E+17       | 3.98E+17 |
